# Supplementary material for: Structure and absolute configuration of liquid molecules based on adamantane derivative cocrystallization
Source: Royal Society of Chemistry journal article supplement (doi:10.1039/d1ra09284g), 2022-01-01
Supplement: d1ra09284g1.pdf [file d1ra09284g1.pdf]

Supporting Information for

**Structure and absolute configuration of liquid molecules based on  
adamantane derivative cocrystallization**

**Guang-Chuan Ou\*, Hai-Yang Chen, Qiong Wang, Qiang Zhou and Fei Zeng\***

**Table S1** Crystal data and structure refinement

| Compound                                             | 1a                                             | 1b                                              | 1c                                               | 1d                                             |
|------------------------------------------------------|------------------------------------------------|-------------------------------------------------|--------------------------------------------------|------------------------------------------------|
| Empirical formula                                    | C <sub>58</sub> H <sub>74</sub> O <sub>9</sub> | C <sub>58</sub> H <sub>73</sub> FO <sub>9</sub> | C <sub>58</sub> H <sub>73</sub> ClO <sub>9</sub> | C <sub>58</sub> H <sub>74</sub> O <sub>9</sub> |
| Formula weight                                       | 915.17                                         | 933.16                                          | 949.61                                           | 915.17                                         |
| Temperature (K)                                      | 296.0(2)                                       | 296.0(2)                                        | 296.0(2)                                         | 296.0(2)                                       |
| Wavelength (Å)                                       | 0.71073                                        | 0.71073                                         | 0.71073                                          | 0.71073                                        |
| Crystal system                                       | Triclinic                                      | Triclinic                                       | Trigonal                                         | Triclinic                                      |
| Space group                                          | P-1                                            | P-1                                             | P-31c                                            | P-1                                            |
| <i>a</i> / Å                                         | 14.473(3)                                      | 14.545(13)                                      | 23.363(17)                                       | 14.606(6)                                      |
| <i>b</i> / Å                                         | 14.587(3)                                      | 14.729(13)                                      | 23.363(17)                                       | 14.673(6)                                      |
| <i>c</i> / Å                                         | 15.394(3)                                      | 15.409(13)                                      | 18.709(14)                                       | 15.496(6)                                      |
| <i>α</i> / °                                         | 66.398(3)                                      | 66.675(11)                                      | 90                                               | 66.376(5)                                      |
| <i>β</i> / °                                         | 80.934(3)                                      | 81.233(12)                                      | 90                                               | 80.644(5)                                      |
| <i>γ</i> / °                                         | 62.894(2)                                      | 62.481(11)                                      | 120                                              | 62.069(5)                                      |
| <i>V</i> / Å <sup>3</sup>                            | 2649.7(10)                                     | 2686.0(4)                                       | 8844.0(15)                                       | 2686.9(19)                                     |
| <i>Z</i>                                             | 2                                              | 2                                               | 6                                                | 2                                              |
| <i>D<sub>c</sub></i> / Mg cm <sup>-3</sup>           | 1.147                                          | 1.154                                           | 1.070                                            | 1.131                                          |
| <i>μ</i> / mm <sup>-1</sup>                          | 0.076                                          | 0.079                                           | 0.114                                            | 0.075                                          |
| <i>F</i> (000)                                       | 988                                            | 1004                                            | 3060                                             | 988                                            |
| Crystal size (mm)                                    | 0.48×0.26×0.23                                 | 0.20×0.20×0.10                                  | 0.42×0.26×0.22                                   | 0.42×0.26×0.23                                 |
| <i>θ</i> range                                       | 1.44 to 27.42                                  | 1.44 to 25.63                                   | 1.48 to 27.81                                    | 1.44 to 27.66                                  |
| Reflections collected                                | 30064                                          | 27184                                           | 98785                                            | 30499                                          |
| Independent reflections                              | 11735 (0.0385)                                 | 10084 (0.0358)                                  | 6889 (0.0735)                                    | 11982 (0.0340)                                 |
| Data/restraints/parameters                           | 11735/30/614                                   | 10084/0/621                                     | 6889/1173/420                                    | 11982/642/672                                  |
| Goodness-of-fit on <i>F</i> <sup>2</sup>             | 1.015                                          | 1.011                                           | 1.022                                            | 1.022                                          |
| Final <i>R</i> indices [ <i>I</i> > 2σ ( <i>I</i> )] | 0.0644, 0.1564                                 | 0.0602, 0.1595                                  | 0.0808, 0.2053                                   | 0.0744, 0.1701                                 |
| <i>R</i> indices (all data)                          | 0.1216, 0.1864                                 | 0.1180, 0.1967                                  | 0.1697, 0.2748                                   | 0.1453, 0.2022                                 |
| Max. peak/hole (e. Å <sup>-3</sup> )                 | 0.238/-0.205                                   | 0.260/-0.243                                    | 0.234/-0.310                                     | 0.560/-0.606                                   |
| Flack parameter                                      |                                                |                                                 |                                                  |                                                |

| Compound                                             | 1e                                                                | 2a                                             | 2b                                             | 2c                                             |
|------------------------------------------------------|-------------------------------------------------------------------|------------------------------------------------|------------------------------------------------|------------------------------------------------|
| Empirical formula                                    | C <sub>116</sub> H <sub>144</sub> Cl <sub>2</sub> O <sub>18</sub> | C <sub>59</sub> H <sub>76</sub> O <sub>9</sub> | C <sub>59</sub> H <sub>76</sub> O <sub>9</sub> | C <sub>59</sub> H <sub>76</sub> O <sub>9</sub> |
| Formula weight                                       | 1897.20                                                           | 929.20                                         | 929.19                                         | 929.19                                         |
| Temperature (K)                                      | 149.9(10)                                                         | 296.0(2)                                       | 149.9(10)                                      | 149.9(10)                                      |
| Wavelength (Å)                                       | 1.54184                                                           | 0.71073                                        | 1.54184                                        | 1.54184                                        |
| Crystal system                                       | Triclinic                                                         | Triclinic                                      | Triclinic                                      | Triclinic                                      |
| Space group                                          | P1                                                                | P-1                                            | P1                                             | P1                                             |
| <i>a</i> / Å                                         | 14.4591(7)                                                        | 14.634(10)                                     | 14.494(9)                                      | 14.494(2)                                      |
| <i>b</i> / Å                                         | 14.5057(5)                                                        | 14.681(10)                                     | 14.691(8)                                      | 14.714(18)                                     |
| <i>c</i> / Å                                         | 15.3163(5)                                                        | 15.413(11)                                     | 15.176(2)                                      | 15.162(2)                                      |
| <i>α</i> / °                                         | 66.263(3)                                                         | 66.757(9)                                      | 66.838(12)                                     | 66.851(12)                                     |
| <i>β</i> / °                                         | 80.241(3)                                                         | 81.050(10)                                     | 81.233(11)                                     | 81.242(11)                                     |
| <i>γ</i> / °                                         | 63.042(4)                                                         | 62.720(10)                                     | 63.018(13)                                     | 63.018(13)                                     |
| <i>V</i> / Å <sup>3</sup>                            | 2620.8(2)                                                         | 2703.0(3)                                      | 2646.1(7)                                      | 2648.3(7)                                      |
| <i>Z</i>                                             | 1                                                                 | 2                                              | 2                                              | 2                                              |
| <i>D<sub>c</sub></i> / Mg cm <sup>-3</sup>           | 1.202                                                             | 1.142                                          | 1.166                                          | 1.165                                          |
| <i>μ</i> / mm <sup>-1</sup>                          | 1.086                                                             | 0.075                                          | 0.611                                          | 0.611                                          |
| <i>F</i> (000)                                       | 1018                                                              | 1004                                           | 1004                                           | 1004                                           |
| Crystal size (mm)                                    | 0.35×0.24×0.21                                                    | 0.48×0.36×0.25                                 | 0.19×0.07×0.06                                 | 0.35×0.25×0.20                                 |
| <i>θ</i> range                                       | 6.30 to 148.89                                                    | 1.44 to 27.42                                  | 6.34 to 152.27                                 | 6.34 to 147.71                                 |
| Reflections collected                                | 41735                                                             | 30680                                          | 79146                                          | 49460                                          |
| Independent reflections                              | 18813 (0.0539)                                                    | 12044(0.0256)                                  | 20430 (0.0245)                                 | 18715 (0.0163)                                 |
| Data/restraints/parameters                           | 18813/2747/1215                                                   | 12044/31/623                                   | 20430/3/1222                                   | 18715/3/1245                                   |
| Goodness-of-fit on <i>F</i> <sup>2</sup>             | 1.043                                                             | 0.997                                          | 1.059                                          | 1.034                                          |
| Final <i>R</i> indices [ <i>I</i> > 2σ ( <i>I</i> )] | 0.0963, 0.2531                                                    | 0.0658, 0.1924                                 | 0.0452, 0.1256                                 | 0.0405, 0.1138                                 |
| <i>R</i> indices (all data)                          | 0.1033, 0.2607                                                    | 0.1217, 0.2351                                 | 0.0463, 0.1269                                 | 0.0410, 0.1147                                 |
| Max. peak/hole (e. Å <sup>-3</sup> )                 | 1.150/-1.060                                                      | 0.547/-0.340                                   | 0.790/-0.350                                   | 0.750/-0.300                                   |
| Flack parameter                                      | 0.124(14)                                                         |                                                | -0.01(4)                                       | 0.04(3)                                        |

| Compound                                            | 2d                                                    | 3a                                               | 3b                                               | 3c                                                               |
|-----------------------------------------------------|-------------------------------------------------------|--------------------------------------------------|--------------------------------------------------|------------------------------------------------------------------|
| Empirical formula                                   | C <sub>68.83</sub> H <sub>89.66</sub> O <sub>10</sub> | C <sub>59</sub> H <sub>77</sub> O <sub>8</sub> N | C <sub>59</sub> H <sub>77</sub> O <sub>8</sub> N | C <sub>118</sub> H <sub>154</sub> O <sub>16</sub> N <sub>2</sub> |
| Formula weight                                      | 1077.03                                               | 928.21                                           | 928.21                                           | 1856.42                                                          |
| Temperature (K)                                     | 296.0(2)                                              | 296.0(2)                                         | 149.9(10)                                        | 149.9(10)                                                        |
| Wavelength (Å)                                      | 0.71073                                               | 0.71073                                          | 1.54184                                          | 1.54184                                                          |
| Crystal system                                      | Trigonal                                              | Triclinic                                        | Triclinic                                        | Triclinic                                                        |
| Space group                                         | P-31c                                                 | P-1                                              | P1                                               | P1                                                               |
| <i>a</i> / Å                                        | 24.169(7)                                             | 14.615(2)                                        | 14.479(2)                                        | 14.4846(4)                                                       |
| <i>b</i> / Å                                        | 24.169(7)                                             | 14.871(3)                                        | 14.669(3)                                        | 14.6777(5)                                                       |
| <i>c</i> / Å                                        | 18.917(8)                                             | 15.668(3)                                        | 15.343(3)                                        | 15.3743(5)                                                       |
| <i>α</i> / °                                        | 90                                                    | 66.701(2)                                        | 66.856(18)                                       | 66.810(3)                                                        |
| <i>β</i> / °                                        | 90                                                    | 80.933(2)                                        | 80.780(14)                                       | 80.771(3)                                                        |
| <i>γ</i> / °                                        | 120                                                   | 61.155(2)                                        | 62.305(16)                                       | 62.298(3)                                                        |
| <i>V</i> / Å <sup>3</sup>                           | 9570.0(7)                                             | 2737.3(8)                                        | 2652.2(9)                                        | 2659.08(17)                                                      |
| <i>Z</i>                                            | 6                                                     | 2                                                | 2                                                | 1                                                                |
| <i>D<sub>c</sub></i> / Mg cm <sup>-3</sup>          | 1.121                                                 | 1.126                                            | 1.162                                            | 1.159                                                            |
| <i>μ</i> / mm <sup>-1</sup>                         | 0.074                                                 | 0.074                                            | 0.600                                            | 0.599                                                            |
| <i>F</i> (000)                                      | 3496                                                  | 1004                                             | 1004                                             | 1004                                                             |
| Crystal size (mm)                                   | 0.36×0.22×0.20                                        | 0.42×0.23×0.20                                   | 0.38×0.27×0.22                                   | 0.20×0.10×0.05                                                   |
| <i>θ</i> range                                      | 1.45 to 25.37                                         | 1.42 to 27.57                                    | 3.13 to 73.86                                    | 6.256 to 148.544                                                 |
| Reflections collected                               | 92494                                                 | 30970                                            | 44949                                            | 69076                                                            |
| Independent reflections                             | 5853 (0.0964)                                         | 12177 (0.0223)                                   | 19817 (0.0213)                                   | 20308 (0.0585)                                                   |
| Data/restraints/parameters                          | 5853/550/440                                          | 12177/693/689                                    | 18783/444/1322                                   | 20308/372/1225                                                   |
| Goodness-of-fit on <i>F</i> <sup>2</sup>            | 0.989                                                 | 1.058                                            | 1.039                                            | 1.076                                                            |
| Final <i>R</i> indices [ <i>I</i> > 2σ( <i>I</i> )] | 0.0713, 0.2012                                        | 0.0766, 0.2423                                   | 0.0482, 0.0503                                   | 0.0670, 0.1897                                                   |
| <i>R</i> indices (all data)                         | 0.1444, 0.2676                                        | 0.1101, 0.2710                                   | 0.1295, 0.1321                                   | 0.0701, 0.1943                                                   |
| Max. peak/hole (e. Å <sup>-3</sup> )                | 0.246/-0.344                                          | 0.625/-0.363                                     | 0.501/-0.316                                     | 0.780/-0.690                                                     |
| Flack parameter                                     |                                                       |                                                  | 0.06(5)                                          | 0.03(8)                                                          |

| Compound                                             | 4a                                                 | 4b                                                 | 5                                               | 6                                                 |
|------------------------------------------------------|----------------------------------------------------|----------------------------------------------------|-------------------------------------------------|---------------------------------------------------|
| Empirical formula                                    | C <sub>55</sub> H <sub>68</sub> O <sub>8</sub> ClN | C <sub>55</sub> H <sub>68</sub> O <sub>8</sub> ClN | C <sub>60</sub> H <sub>76</sub> O <sub>10</sub> | C <sub>104</sub> H <sub>133</sub> O <sub>18</sub> |
| Formula weight                                       | 906.55                                             | 906.55                                             | 957.21                                          | 1671.10                                           |
| Temperature (K)                                      | 296.0(2)                                           | 296.0(2)                                           | 296.0(2)                                        | 296.0(2)                                          |
| Wavelength (Å)                                       | 0.71073                                            | 0.71073                                            | 0.71073                                         | 0.71073                                           |
| Crystal system                                       | Triclinic                                          | Triclinic                                          | Triclinic                                       | Triclinic                                         |
| Space group                                          | P-1                                                | P-1                                                | P-1                                             | P-1                                               |
| <i>a</i> / Å                                         | 14.435(8)                                          | 14.412(9)                                          | 14.571(10)                                      | 14.490(7)                                         |
| <i>b</i> / Å                                         | 14.541(8)                                          | 14.557(2)                                          | 14.891(11)                                      | 14.479(7)                                         |
| <i>c</i> / Å                                         | 15.528(8)                                          | 15.542(2)                                          | 15.392(11)                                      | 15.489(7)                                         |
| <i>α</i> / °                                         | 66.197(6)                                          | 66.340(2)                                          | 102.473(8)                                      | 81.001(6)                                         |
| <i>β</i> / °                                         | 81.269(7)                                          | 81.457(2)                                          | 96.914(8)                                       | 66.274(5)                                         |
| <i>γ</i> / °                                         | 61.464(6)                                          | 61.084(2)                                          | 119.118(7)                                      | 62.645(5)                                         |
| <i>V</i> / Å <sup>3</sup>                            | 2616.0(2)                                          | 2636.0(6)                                          | 2747.0(3)                                       | 2641.0(2)                                         |
| <i>Z</i>                                             | 2                                                  | 2                                                  | 2                                               | 2                                                 |
| <i>D<sub>c</sub></i> / Mg cm <sup>-3</sup>           | 1.151                                              | 1.142                                              | 1.157                                           | 1.051                                             |
| <i>μ</i> / mm <sup>-1</sup>                          | 0.125                                              | 0.124                                              | 0.077                                           | 0.071                                             |
| <i>F</i> (000)                                       | 972                                                | 972                                                | 1032                                            | 901                                               |
| Crystal size (mm)                                    | 0.42×0.23×0.20                                     | 0.35×0.21×0.18                                     | 0.45×0.42×0.36                                  | 0.42×0.26×0.21                                    |
| <i>θ</i> range                                       | 1.44 to 27.52                                      | 1.43 to 25.01                                      | 1.40 to 25.01                                   | 1.44 to 27.54                                     |
| Reflections collected                                | 29644                                              | 25426                                              | 26435                                           | 27919                                             |
| Independent reflections                              | 11615 (0.0274)                                     | 9282 (0.0211)                                      | 9676 (0.0219)                                   | 11454 (0.0327)                                    |
| Data/restraints/parameters                           | 11615/609/634                                      | 9282/801/647                                       | 9676/44/641                                     | 11454/569/642                                     |
| Goodness-of-fit on <i>F</i> <sup>2</sup>             | 1.047                                              | 1.062                                              | 1.041                                           | 1.060                                             |
| Final <i>R</i> indices [ <i>I</i> > 2σ ( <i>I</i> )] | 0.0636, 0.1777                                     | 0.0688, 0.2038                                     | 0.0651, 0.1940                                  | 0.0972, 0.3007                                    |
| <i>R</i> indices (all data)                          | 0.1129, 0.2081                                     | 0.0885, 0.2317                                     | 0.0860, 0.2188                                  | 0.1333, 0.3339                                    |
| Max. peak/hole (e. Å <sup>-3</sup> )                 | 0.376/-0.443                                       | 0.505/-0.533                                       | 0.492/-0.338                                    | 0.613/-0.280                                      |
| Flack parameter                                      |                                                    |                                                    |                                                 |                                                   |

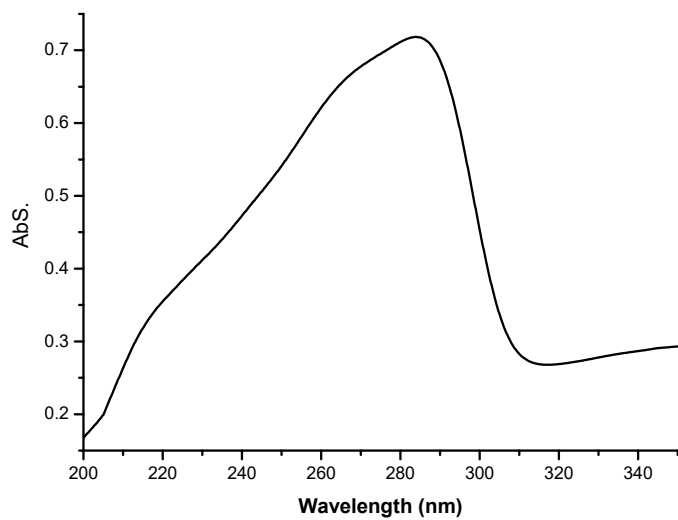

Fig. S1 The solid UV-vis. spectra of **3b**.
